# Supplementary figures and images for: Polymorphonuclear Myeloid-Derived Suppressor Cells Promote Inflammation Progression of Rheumatoid Arthritis by Inducing Age-Associated B Cell Proliferation and Differentiation via the BAFF-Mediated SYK-ERK1/2 Pathway
Source: Research Square preprint supplement (doi:10.21203/rs.3.rs-6846731/v1), 2025-07-23

ERK1/2 P-ERK1/2


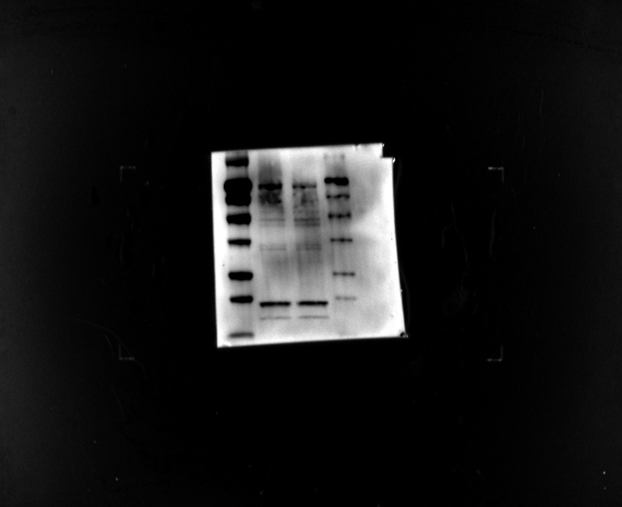

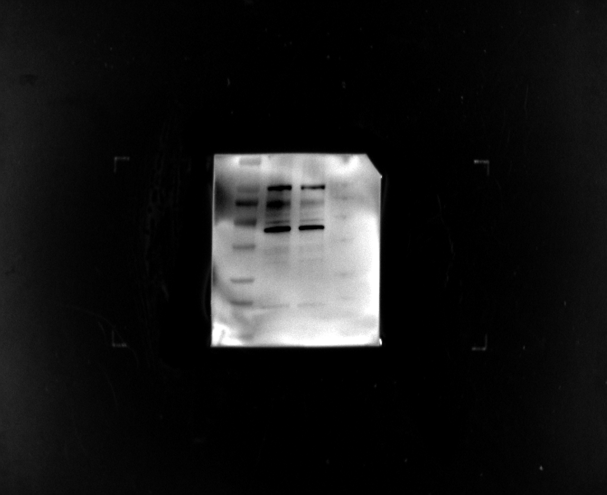


GAPDH


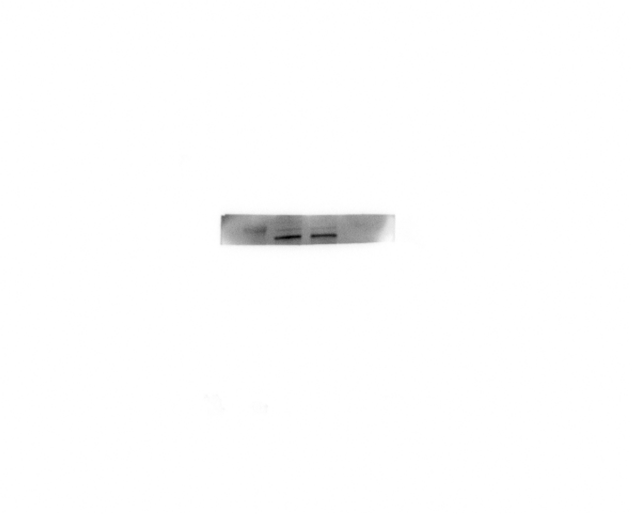

Supplement: Supplementary file 1 [file 60b13dd75ec189117d682e35.docx]
